# Supplementary material for: Rapid quantification of ethanol content in aqueous solutions using a ratiometric fluorescent sensor
Source: Royal Society of Chemistry journal article supplement (doi:10.1039/d2sd00063f), 2022-01-01
Supplement: d2sd00063f1.pdf [file d2sd00063f1.pdf]

## Supplementary Information

### Rapid quantification of the ethanol content in aqueous solutions using a ratiometric fluorescent sensor

Tianruo Shen, Davin Tan, Meyammai Shanmugham and Xiaogang Liu\*

Fluorescence Research Group, Singapore University of Technology and Design (SUTD), 8 Somapah Road, Singapore 487372, Singapore

\*Corresponding author: Xiaogang Liu ([xiaogang\\_liu@sutd.edu.sg](mailto:xiaogang_liu@sutd.edu.sg))

## Contents

|                                                                                                                    |     |
|--------------------------------------------------------------------------------------------------------------------|-----|
| 1. Comparison with alternative ethanol detection techniques .....                                                  | S2  |
| 2. Experimental and computational methods.....                                                                     | S6  |
| 3. Optical properties of acridine in different solvents .....                                                      | S8  |
| 4. Optical properties of acridine in EtOH-water mixtures under different temperatures and dye concentrations ..... | S9  |
| 5. Investigating the effects of impurities and pH on the detection.....                                            | S11 |
| 6. Demonstration of the ratiometric method.....                                                                    | S14 |
| 7. Computational analysis of the fluorescence mechanism .....                                                      | S21 |
| 8. References .....                                                                                                | S24 |

## 1. Comparison with alternative ethanol detection techniques

The following reported methods, including titration,<sup>1,2</sup> densitometry,<sup>3,4</sup> spectrophotometry,<sup>5-8</sup> gas chromatography (GC),<sup>9-11</sup> high-performance liquid chromatography (HPLC),<sup>12,13</sup> electrochemistry,<sup>14-16</sup> discoloration,<sup>17,18</sup> and fluorescence,<sup>19-24</sup> for qualifying the ethanol concentration were compared and briefly discussed in Table S1.

**Table S1** Discussion of the reported techniques.

| No | Reference                            | Basic Principle   | Remarks                                                                                                                                                              |
|----|--------------------------------------|-------------------|----------------------------------------------------------------------------------------------------------------------------------------------------------------------|
| 1  | Fisher <sup>1</sup>                  | Titration         | Golden standard method, high generalizability, requires specific instrument and operation process, uses toxic reagents                                               |
| 2  | Nogueira <i>et al</i> <sup>2</sup>   | Titration         | Detection range (0~50% v/v), foldable paper-based analytical device, convenient operation, requires specific fabrication                                             |
| 3  | Danahy <i>et al</i> <sup>3</sup>     | Densitometry      | Detection range (0~100% w/w), <i>in-situ</i> system control, requires special equipment and operation procedures                                                     |
| 4  | Li <i>et al</i> <sup>4</sup>         | Densitometry      | Detection range (48~78% v/v), novel hops image-based detection, uses artificial intelligence algorithm, requires special equipment and specific operation procedures |
| 5  | Abreu <i>et al</i> <sup>5</sup>      | Spectrophotometry | Detection range (4~24% v/v), fast response, minimal sample consumption, commercially available chemical materials, requires specific operation procedures            |
| 6  | Choengchan <i>et al</i> <sup>6</sup> | Spectrophotometry | Detection range (0.5~30% v/v), uses commercially available chemical materials, reduces sample                                                                        |

|    |                                       |                   |                                                                                                                                                                               |
|----|---------------------------------------|-------------------|-------------------------------------------------------------------------------------------------------------------------------------------------------------------------------|
|    |                                       |                   | contamination, requires specific operation procedures                                                                                                                         |
| 7  | Fletcher and Van Staden <sup>7</sup>  | Spectrophotometry | Detection range (0~6% v/v), uses commercially available chemical materials, uses minimal reagents, requires specific operation procedures                                     |
| 8  | Sriariyanun <i>et al</i> <sup>8</sup> | Spectrophotometry | Detection range (0.7~8% v/v), fast response, uses commercially available chemical materials, encounters low solubility of the probe                                           |
| 9  | Tiscione <i>et al</i> <sup>9</sup>    | GC                | Detection range (0.01~1 g/dL), high sensitivity and selectivity, minimal sample consumption, requires considerable testing time                                               |
| 10 | Buckee and Mundy <sup>10</sup>        | GC                | Detection range (0.93~6.05% v/v), high sensitivity, minimal sample consumption, high reproducibility, requires specific analytical tools                                      |
| 11 | Wasfi <i>et al</i> <sup>11</sup>      | GC                | Detection range (5~200 mg/dL), high sensitivity, minimal sample consumption, requires considerable testing time and specific operation procedures,                            |
| 12 | López and Gómez <sup>12</sup>         | HPLC              | Detection range (0.5~10% v/v), commercially available chemical materials, high reproducibility, needs a large amount of reagents, requires specific operation procedures      |
| 13 | Yarita <i>et al</i> <sup>13</sup>     | HPLC              | Detection range (1~2% v/v), low-cost reagents, commercially available chemical materials, high accuracy, requires considerable testing time and specific operation procedures |

|    |                                    |                  |                                                                                                                                                                                                                               |
|----|------------------------------------|------------------|-------------------------------------------------------------------------------------------------------------------------------------------------------------------------------------------------------------------------------|
| 14 | Bueno and Paixao <sup>14</sup>     | Electrochemistry | Detection range (75~90% v/v), fast response, high sensitivity, requires specific fabrication and analytical tools                                                                                                             |
| 15 | Shan <i>et al</i> <sup>15</sup>    | Electrochemistry | Detection range (25~200 $\mu$ M), fast response, high sensitivity, requires specific fabrication                                                                                                                              |
| 16 | Cinti <i>et al</i> <sup>16</sup>   | Electrochemistry | Detection range (0~5% v/v), paper-based sensor, fast response, minimal sample consumption, requires specific fabrication                                                                                                      |
| 17 | Yu <i>et al</i> <sup>17</sup>      | Discoloration    | Detection range (0~40% v/v), reusable indicator, fast response, straightforward evaluation, requires specific synthetic routes and operation procedures                                                                       |
| 18 | Shahvar <i>et al</i> <sup>18</sup> | Discoloration    | Detection range (98~99.5% v/v), smartphone-based detection, minimal sample consumption, requires toxic reagents                                                                                                               |
| 19 | Sharma and Quantrill <sup>19</sup> | Fluorescence     | Detection range (0~40 mM), commercially available chemical materials, involves chemical reactions, requires considerable testing time and specific analytical tools                                                           |
| 20 | Hu <i>et al</i> <sup>20</sup>      | Fluorescence     | Detection range (0~100% v/v), ratiometric detection, high sensitivity, requires specific synthetic routes                                                                                                                     |
| 21 | Passos <i>et al</i> <sup>21</sup>  | Fluorescence     | Detection range (0~10% w/w), uses commercially available fluorophore, requires accurately controlled probe concentration for absorbance/emission intensity measurement, or expensive instrumentation for lifetime measurement |

|    |                                |              |                                                                                                                                                                                                           |
|----|--------------------------------|--------------|-----------------------------------------------------------------------------------------------------------------------------------------------------------------------------------------------------------|
| 22 | Jung <i>et al</i> <sup>2</sup> | Fluorescence | Detection range (60~90% v/v), ratiometric detection, smartphone-based detection, provides fast response, experiences low solubility of the probe, requires specific synthetic routes with toxic materials |
| 23 | Yin <i>et al</i> <sup>3</sup>  | Fluorescence | Detection range (0~100% v/v), real-time detection, ratiometric detection, requires specific synthetic routes with toxic chemical agents                                                                   |
| 24 | Fang <i>et al</i> <sup>4</sup> | Fluorescence | Detection range (0~100% v/v), film-based sensor, fast response, reduces sample contamination, requires specific synthetic routes                                                                          |

## 2. Experimental and computational methods

### Chemical Materials

**Table S2** Details of chemicals for the experiments.

| No. | Name                            | CAS No.  | Company       | Product No. |
|-----|---------------------------------|----------|---------------|-------------|
| 1   | Acridine                        | 260-94-6 | Sigma-Aldrich | A23609      |
| 2   | Acetonitrile                    | 75-05-8  | Sigma-Aldrich | 271004      |
| 3   | Glycerol $\geq 99\%$ v/v        | 56-81-5  | Sigma-Aldrich | G7757       |
| 4   | Ethyl acetate                   | 141-78-6 | VWR           | 23881.293   |
| 5   | Dimethylformamide               | 68-12-2  | VWR           | 23466.298   |
| 6   | Ethylene glycol $\geq 99\%$ v/v | 107-21-1 | VWR           | 24041.297   |
| 7   | Buffer pH = $4.00 \pm 0.02$     | NA       | VWR           | 32095.297   |
| 8   | Buffer pH = $7.00 \pm 0.02$     | NA       | VWR           | 32096.291   |
| 9   | Buffer pH = $10.00 \pm 0.02$    | NA       | VWR           | 32040.298   |
| 10  | Ethanol 90% (v/v)               | 64-17-5  | VWR           | 83811.360   |
| 11  | 1,4-Dioxane                     | 123-91-1 | TCI           | D0860       |
| 12  | Ethanol $>99.9\%$ v/v           | 64-17-5  | TCI           | CT04        |
| 13  | Methanol $>99.8\%$ v/v          | 67-56-1  | TCI           | M0097       |
| 14  | Dimethyl sulfoxide              | 67-68-5  | TCI           | D5293       |

The water used for the experiments was the ultrapure water purified by the Arium Comfort II Benchtop Water Purification System with Integrated UV Lamp (H2O-II-1-UV-T) from Sartorius Stedim Singapore Pte. Ltd.

### Spectral measurements

The emission spectra were measured using Duetta Fluorescence and Absorbance Spectrometer from HORIBA Scientific. Temperatures were controlled and adjusted using EXT-400 Liquid Cooling System from Koolance Inc and TC1 Temperature Controller from Quantum Northwest Inc, respectively.

The emission spectra of acridine were collected at 355 nm of excitation wavelength at 100  $\mu$ M dye concentrations (unless specifically stated) in 1,4-dioxane (Diox), ethyl acetate (EAC), acetonitrile (ACN), dimethylformamide (DMF), dimethyl sulfoxide (DMSO), ethanol (EtOH), methanol (MeOH), ethylene glycol (EG), water, different buffers, and different ethanol-water mixtures, respectively.

### **Computational methods**

Density functional theory (DFT) and time-dependent density functional theory (TD-DFT) calculations were conducted in Gaussian 16 program.<sup>25-27</sup> We considered six functional with different Hartree-Fock exchange fractions (HF%),<sup>28</sup> including B3LYP (HF% = 20%),<sup>29</sup> PBE0 (25%),<sup>30,31</sup> PW6B95 (28%),<sup>32</sup> BMK (42%),<sup>33</sup> M06-2X (54%),<sup>34</sup> and  $\omega$ B97XD (22~100%)<sup>35</sup> with the def2-SVP basis set.<sup>36</sup> Solvation effects were considered using the SMD solvent model and linear-response (LR) solvent formalism in water.<sup>37-39</sup> All the optimized geometries were confirmed at the local minimum of the potential energy surfaces (unless specifically stated) in the ground state ( $S_0$ ), the first excited state ( $S_1$ ), and the second excited state ( $S_2$ ). The hole-electron distributions were visualized using Multiwfn and VMD software.<sup>40,41</sup>



### 3. Optical properties of acridine in different solvents

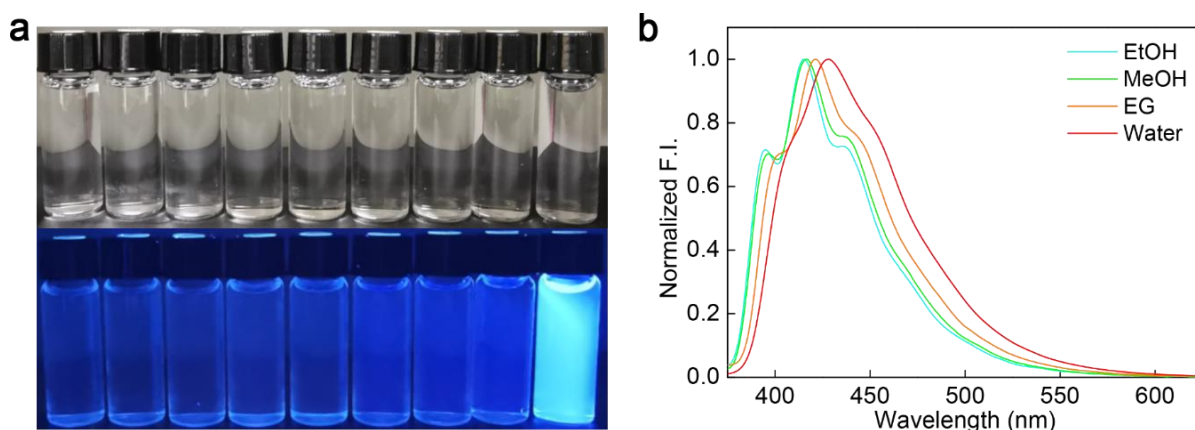

**Fig. S1** (a) Samples of acridine in different solvents (acridine concentration = 100  $\mu\text{M}$ ). From left to right: Diox, EAC, ACN, DMF, DMSO, EtOH, MeOH, EG, and water under daylight (top) and UV light (bottom); (b) Normalized emission spectra of acridine in three alcohols and water.

**Table S3** Dielectric constants ( $\epsilon$ ) of the solvents and the peak fluorescence intensity (F.I.) in these solvents.

| No. | Solvent | $\epsilon$ | Peak F.I. (a.u.) |
|-----|---------|------------|------------------|
| 1   | Diox    | 2.2099     | 19.19            |
| 2   | EAC     | 5.9867     | 14.23            |
| 3   | ACN     | 35.688     | 23.74            |
| 4   | DMF     | 37.219     | 32.88            |
| 5   | DMSO    | 46.826     | 41.00            |
| 6   | EtOH    | 24.852     | 361.46           |
| 7   | MeOH    | 32.613     | 472.13           |
| 8   | EG      | 40.254     | 630.27           |
| 9   | Water   | 78.3553    | 7567.97          |

#### 4. Optical properties of acridine in EtOH-water mixtures under different temperatures and dye concentrations

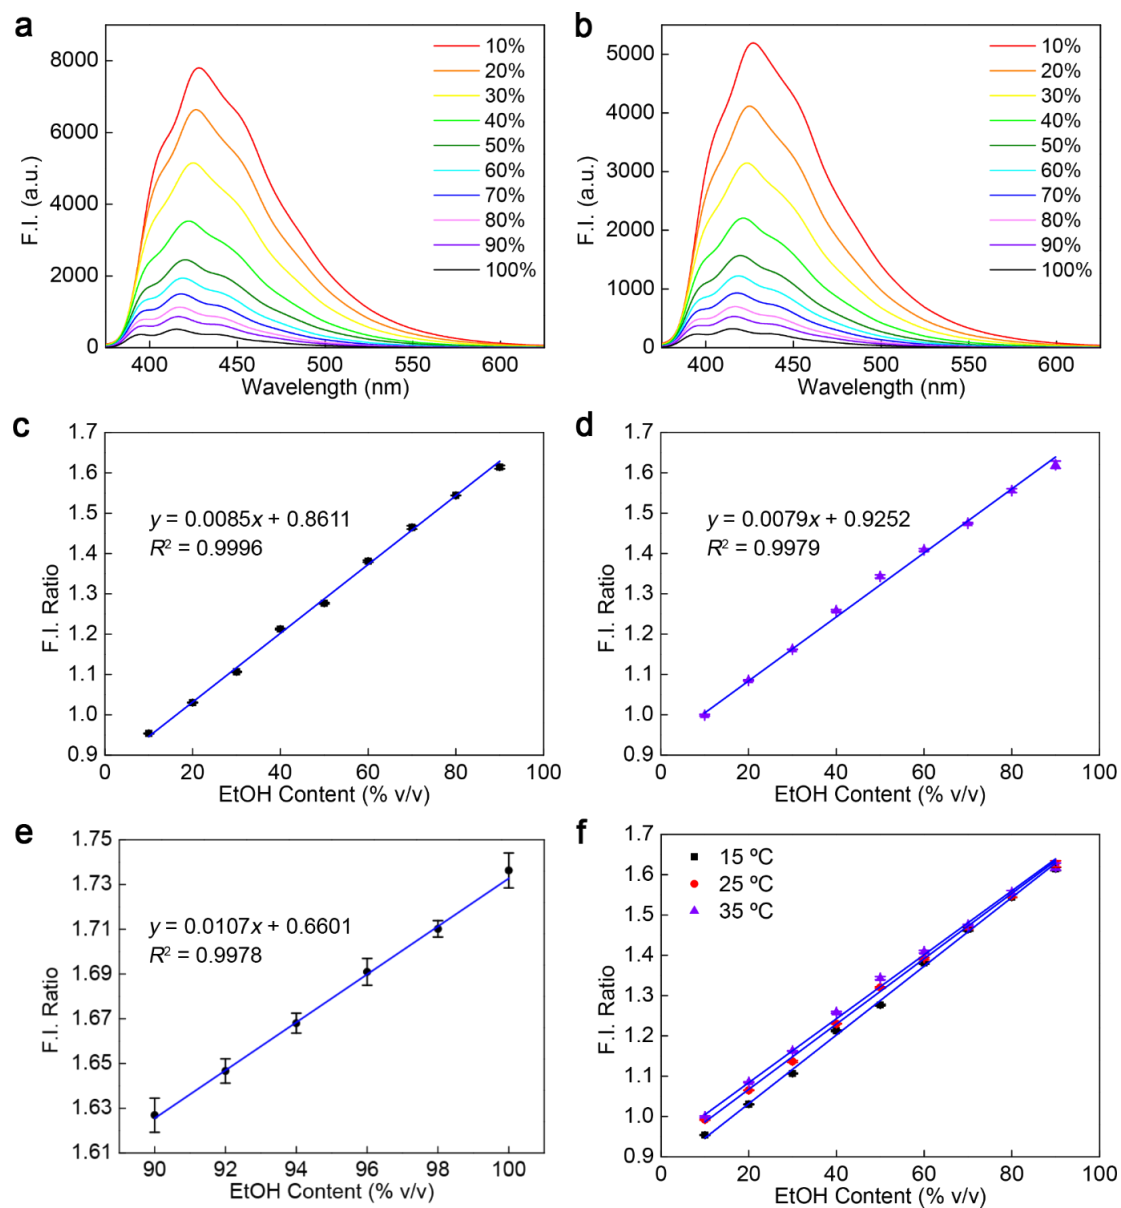

**Fig. S2** Emission spectra of acridine in various EtOH-water mixtures at (a) 15 °C and (b) 35 °C; The EtOH content-dependence of fluorescence intensity (F.I.) ratios with linear fitting curves of acridine from 10~90% v/v EtOH content at (c) 15 °C and (d) 35 °C (The insets show the equations of the best linear fits); (e) The EtOH content-dependence of fluorescence intensity (F.I.) ratios of acridine from 90~100% v/v EtOH content with linear fitting curves of acridine (The insets illustrates the equations of the best linear fits) at 25 °C; (f) The EtOH content-dependence of fluorescence intensity (F.I.) ratios with linear fitting curves of acridine from 10~90% v/v EtOH content at different temperatures.

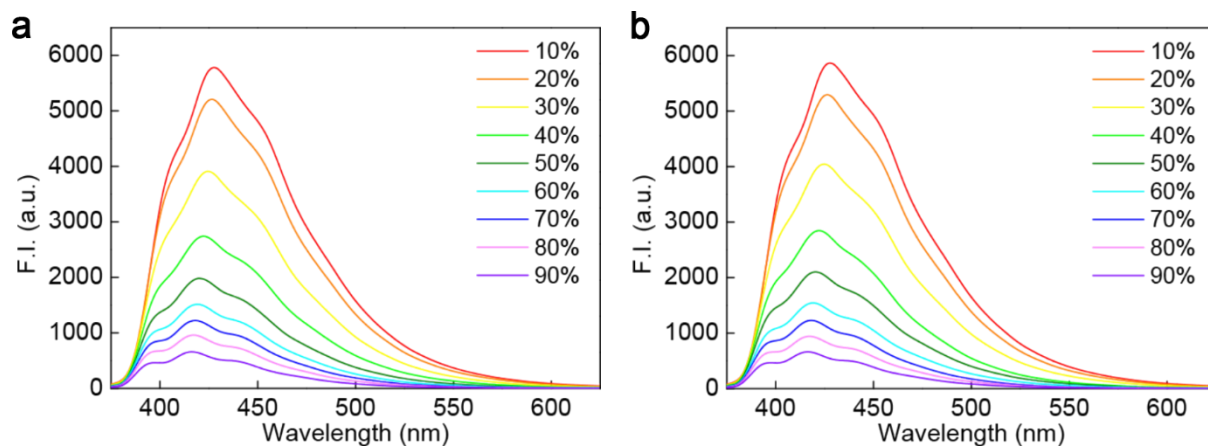

**Fig. S3** Emission spectra of acridine in various EtOH-water mixtures with a dye concentration of (a) 110  $\mu\text{M}$  and (b) 120  $\mu\text{M}$ .

## 5. Investigating the effects of impurities and pH on the detection

Two ethanolic samples (the concentration of acridine = 100  $\mu\text{M}$ ) were prepared to assess the potential impact of the impurities. Sample 1 (the control sample) contains 75% v/v EtOH and 25% v/v water. In Sample 2 (the experimental sample), 1% v/v impurity (MeOH: EG: glycerol = 4:2:1 v/v/v) was dissolved in the mixture of 75% v/v EtOH and 24% v/v water. Our ratiometric method was applied for quantifying the EtOH concentration of each sample (Fig. 1c, S4, and S5).

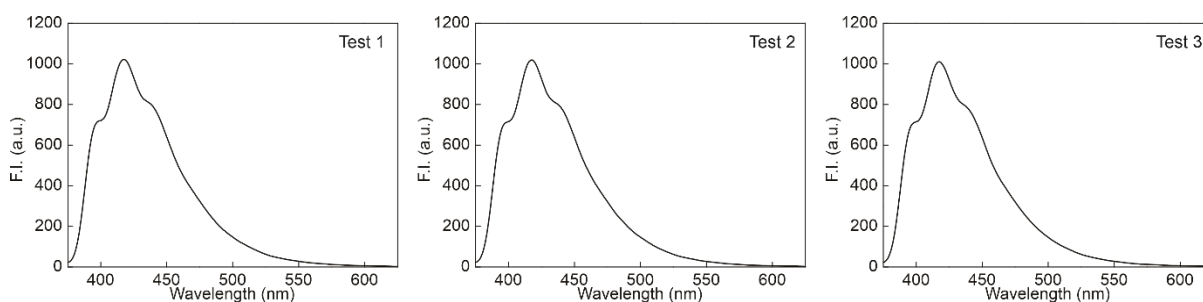

**Fig. S4** Emission spectra of Sample 1 during three tests.

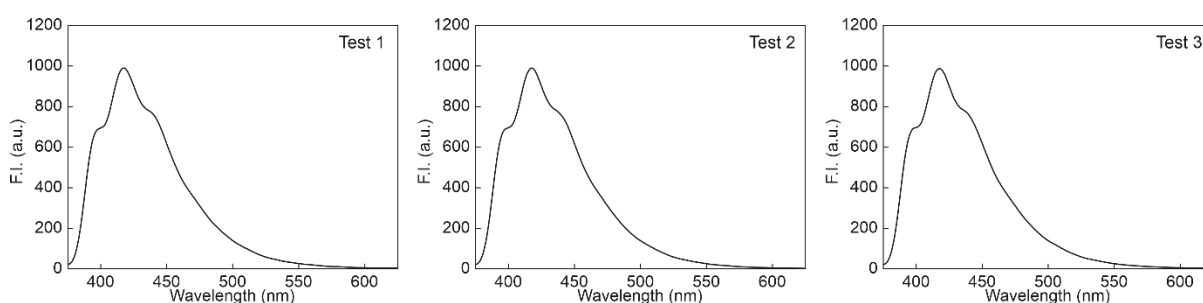

**Fig. S5** Emission spectra of Sample 2 during three tests.

The results showed that the average measured values of Sample 1 and Sample 2 are 74.94% and 75.18%, respectively (Table S4). These experiments indicated that a small amount of impurities has minimal influence on the detection accuracy.

**Table S4** Results of the measurements for Samples 1 and 2.

| Sample                | 1                      |       |       | 2     |       |       |
|-----------------------|------------------------|-------|-------|-------|-------|-------|
| Test                  | 1                      | 2     | 3     | 1     | 2     | 3     |
| F.I. ratio            | 1.514                  | 1.516 | 1.506 | 1.518 | 1.513 | 1.512 |
| Equation              | $y = 0.0081x + 0.9052$ |       |       |       |       |       |
| Concentration (% v/v) | 75.22                  | 75.45 | 74.15 | 75.69 | 75.00 | 74.86 |
| Average (% v/v)       | 74.94                  |       |       | 75.18 |       |       |
| Standard deviation    | 0.565                  |       |       | 0.360 |       |       |
| Absolute error (%)    | 0.06                   |       |       | 0.18  |       |       |
| Relative error (%)    | 0.08                   |       |       | 0.25  |       |       |

We also carried out the spectral measurements of acridine in various MeOH-water mixtures (Fig. S6). The results showed that the calibration to methanol is different from that of ethanol, illustrated by a different slope (0.0067).

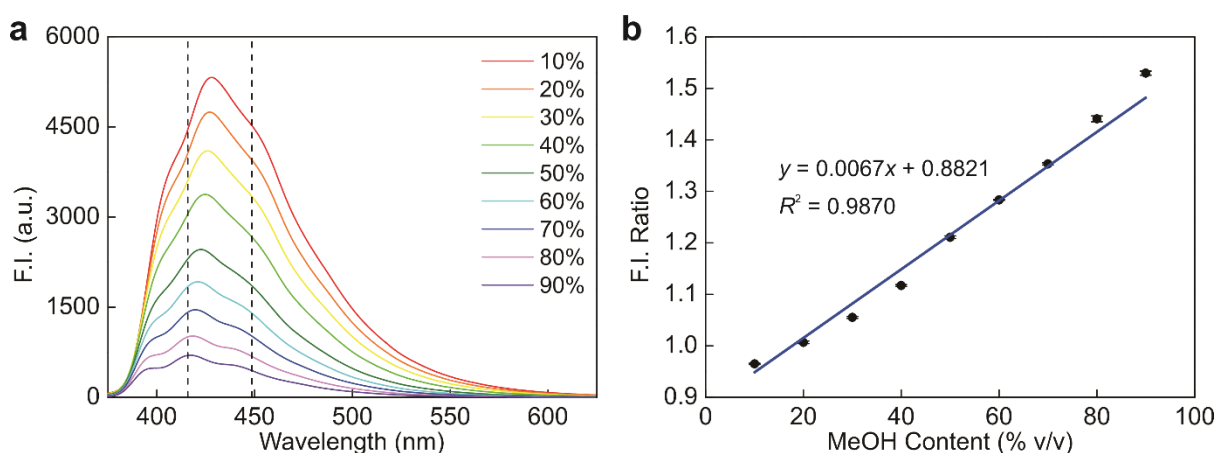

**Fig. S6** (a) The emission spectra of acridine (100  $\mu$ M) in various MeOH-water mixtures at 25  $^{\circ}$ C; the two dash lines highlight the fluorescence intensity (F.I.) at 415 nm and 448 nm, respectively; (b) The methanol content-dependence of F.I. ratios (the ratio of F.I. values at 415 nm and 448 nm) with corresponding linear fitting curve; the inset shows the best linear fitting equation.

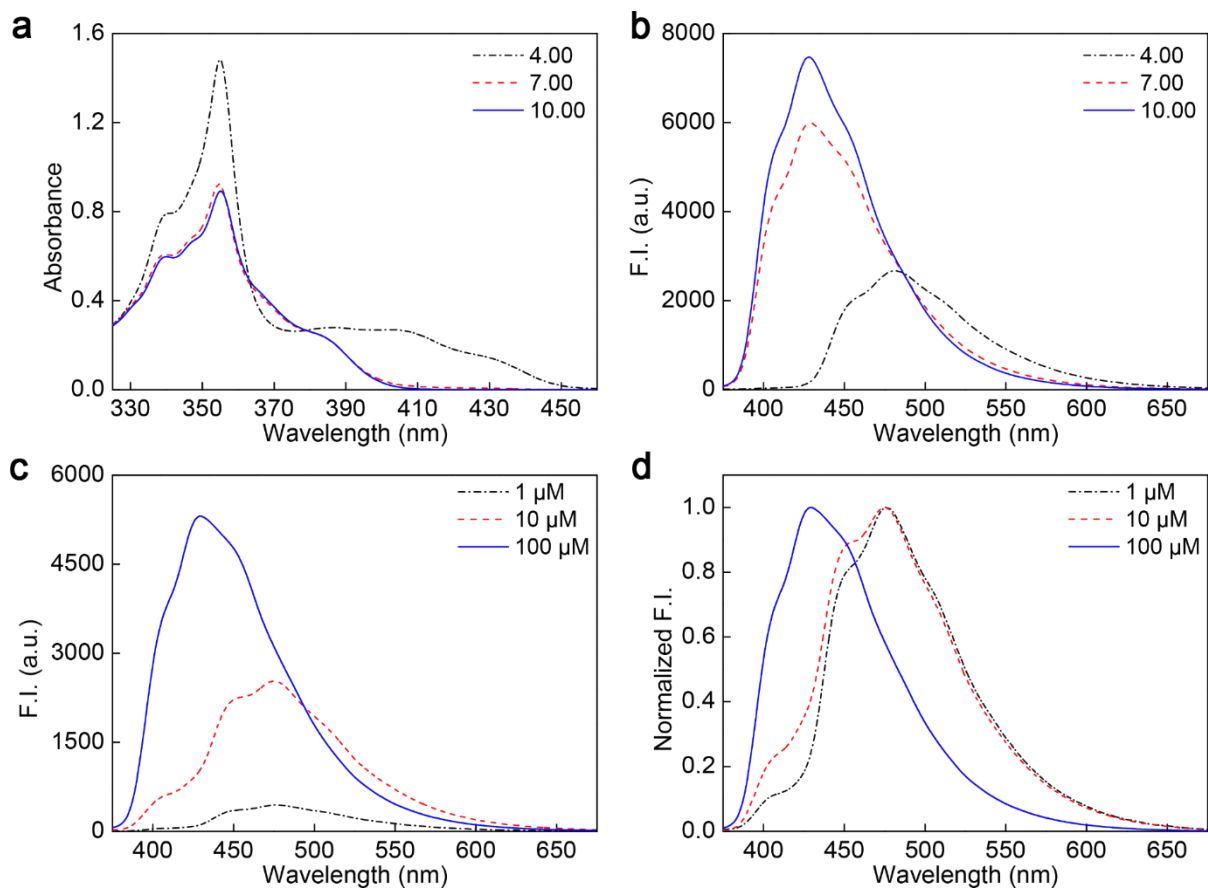

**Fig. S7** (a) UV-vis absorption and (b) emission spectra of acridine in different buffers; (c) Emission and (d) normalized emission spectra of acridine with different dye concentrations in the pH  $\approx$  6.5 water.

## 6. Demonstration of the ratiometric method

We collected the emission spectra of acridine dissolved in EtOH purchased from VWR Singapore Pte Ltd, with the labelled concentration (90% v/v) (Fig. S5). We calculated the F.I. ratios between 415 nm and 448 nm and substituted the ratios into the linear fitting equation in Fig. 1c and S2e, as 90% v/v is a boundary value. Our results showed that this method has good reproducibility with low errors (Table S3).

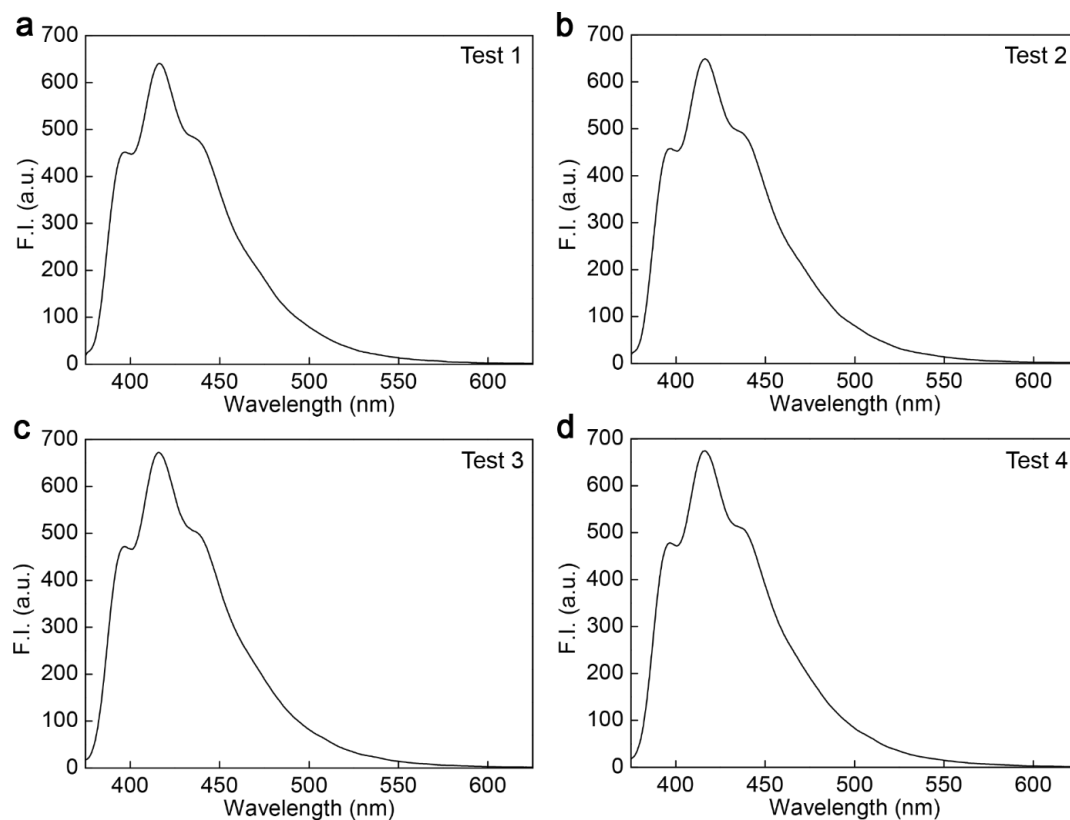

**Fig. S8** Emission spectra of acridine dissolved into the calibrated EtOH solutions (90% v/v) from VWR for four testing times.

**Table S5** Results of the measurement of calibrated 90% v/v ethanol using two linear fitting curves.

| Test                  | 1                      | 2     | 3     | 4     | 1                      | 2     | 3     | 4     |
|-----------------------|------------------------|-------|-------|-------|------------------------|-------|-------|-------|
| F.I. ratio            | 1.623                  | 1.625 | 1.631 | 1.626 | 1.623                  | 1.625 | 1.631 | 1.626 |
| Equation              | $y = 0.0081x + 0.9052$ |       |       |       | $y = 0.0107x + 0.6601$ |       |       |       |
| Concentration (% v/v) | 88.67                  | 88.92 | 89.55 | 88.95 | 89.77                  | 89.96 | 90.44 | 89.99 |
| Average (% v/v)       | 89.02                  |       |       |       | 90.04                  |       |       |       |
| Standard deviation    | 0.325                  |       |       |       | 0.245                  |       |       |       |
| Absolute error (%)    | 0.98                   |       |       |       | 0.04                   |       |       |       |
| Relative error (%)    | 1.08                   |       |       |       | 0.05                   |       |       |       |

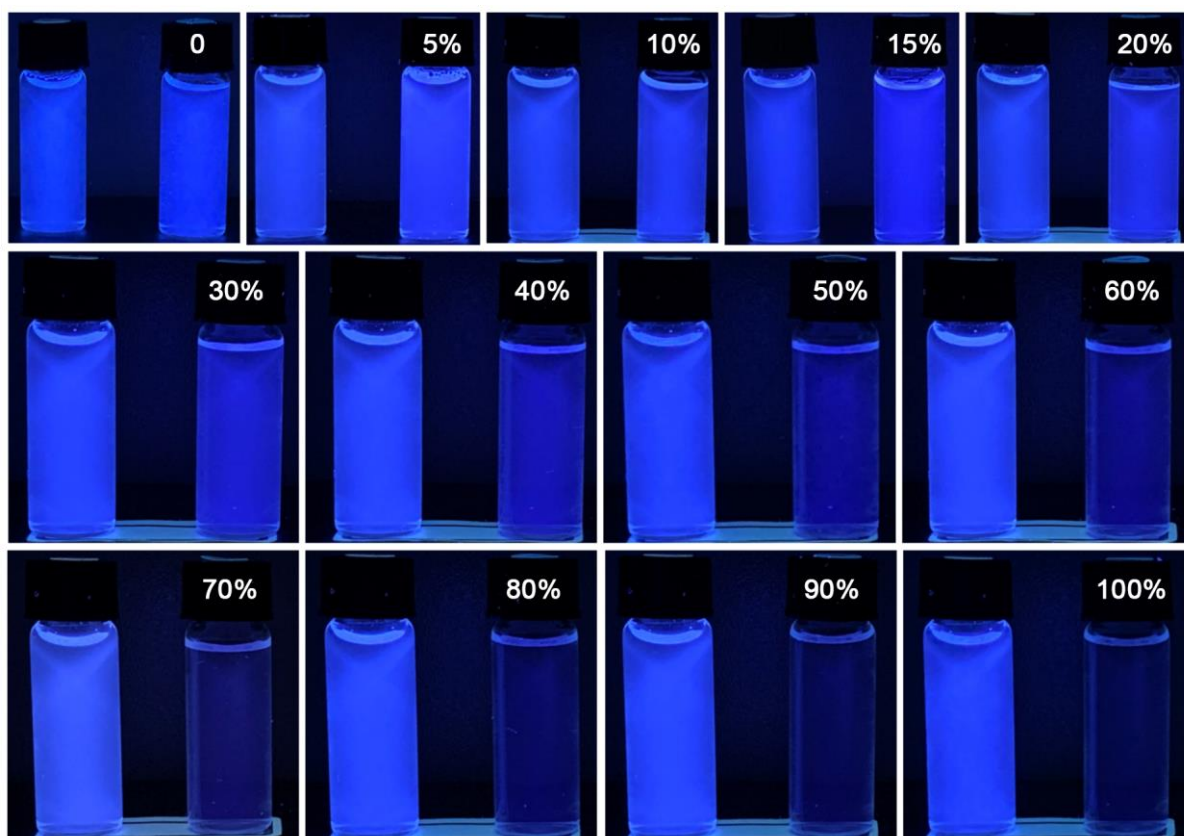

**Fig. S9** Photographs of the reference acridine sample (left) and the known samples (right) with different EtOH contents under UV light (The inset shows the EtOH content of the solution in each vial). The images were captured using a normal smartphone.



**Table S6** Intensity values of the blue and green channels from the photos of reference (left) and known (right) samples taken by the smartphone (Test 1).

| Channel | Blue |       |       | Green |       |       |
|---------|------|-------|-------|-------|-------|-------|
|         | Left | Right | Ratio | Left  | Right | Ratio |
| 0       | 254  | 255   | 1.004 | 65    | 65    | 1.000 |
| 5       | 254  | 253   | 0.996 | 75    | 69    | 0.920 |
| 10      | 243  | 239   | 0.984 | 65    | 56    | 0.862 |
| 15      | 244  | 242   | 0.992 | 70    | 54    | 0.771 |
| 20      | 244  | 228   | 0.934 | 66    | 47    | 0.712 |
| 30      | 254  | 201   | 0.791 | 68    | 33    | 0.485 |
| 40      | 254  | 180   | 0.709 | 70    | 27    | 0.386 |
| 50      | 254  | 153   | 0.602 | 68    | 18    | 0.265 |
| 60      | 253  | 132   | 0.522 | 72    | 13    | 0.181 |
| 70      | 250  | 111   | 0.444 | 88    | 29    | 0.330 |
| 80      | 254  | 96    | 0.378 | 73    | 13    | 0.178 |
| 90      | 254  | 77    | 0.303 | 73    | 8     | 0.110 |
| 100     | 255  | 64    | 0.251 | 64    | 8     | 0.125 |

**Table S7** Intensity values of the blue and green channels from the photos of reference (left) and known (right) samples taken by the smartphone (Test 2).

| Channel | Blue |       |       | Green |       |       |
|---------|------|-------|-------|-------|-------|-------|
|         | Left | Right | Ratio | Left  | Right | Ratio |
| 0       | 254  | 253   | 0.996 | 63    | 64    | 1.016 |
| 5       | 255  | 255   | 1.000 | 76    | 69    | 0.908 |
| 10      | 238  | 236   | 0.992 | 65    | 55    | 0.846 |
| 15      | 249  | 243   | 0.976 | 73    | 57    | 0.781 |
| 20      | 244  | 231   | 0.947 | 66    | 47    | 0.712 |
| 30      | 253  | 201   | 0.794 | 66    | 35    | 0.530 |
| 40      | 255  | 178   | 0.698 | 68    | 25    | 0.368 |
| 50      | 255  | 143   | 0.561 | 67    | 16    | 0.239 |
| 60      | 254  | 129   | 0.508 | 73    | 15    | 0.205 |
| 70      | 251  | 106   | 0.422 | 89    | 24    | 0.270 |
| 80      | 254  | 94    | 0.370 | 75    | 12    | 0.160 |
| 90      | 253  | 77    | 0.304 | 72    | 10    | 0.139 |
| 100     | 253  | 66    | 0.261 | 63    | 10    | 0.159 |

**Table S8** Intensity values of the blue and green channels from the photos of reference (left) and known (right) samples taken by the smartphone (Test 3).

| Channel | Blue |       |       | Green |       |       |
|---------|------|-------|-------|-------|-------|-------|
|         | Left | Right | Ratio | Left  | Right | Ratio |
| 0       | 253  | 252   | 0.996 | 63    | 63    | 1.000 |
| 5       | 254  | 254   | 1.000 | 73    | 68    | 0.932 |
| 10      | 244  | 239   | 0.980 | 66    | 57    | 0.864 |
| 15      | 247  | 245   | 0.992 | 73    | 60    | 0.822 |
| 20      | 242  | 234   | 0.967 | 64    | 49    | 0.766 |
| 30      | 254  | 204   | 0.803 | 67    | 35    | 0.522 |
| 40      | 254  | 179   | 0.705 | 70    | 23    | 0.329 |
| 50      | 254  | 147   | 0.579 | 66    | 14    | 0.212 |
| 60      | 255  | 130   | 0.510 | 71    | 13    | 0.183 |
| 70      | 250  | 100   | 0.400 | 88    | 22    | 0.250 |
| 80      | 255  | 93    | 0.365 | 74    | 11    | 0.149 |
| 90      | 254  | 78    | 0.307 | 73    | 8     | 0.110 |
| 100     | 253  | 63    | 0.249 | 61    | 8     | 0.131 |

**Table S9** Average intensities of the blue and green channels from the photos of various samples taken by the smartphone.

| Channel | Blue    |                     | Green   |                     |
|---------|---------|---------------------|---------|---------------------|
|         | Average | Standard derivation | Average | Standard derivation |
| 0       | 0.999   | 0.004               | 1.005   | 0.007               |
| 5       | 0.999   | 0.002               | 0.920   | 0.010               |
| 10      | 0.985   | 0.005               | 0.857   | 0.008               |
| 15      | 0.987   | 0.008               | 0.791   | 0.022               |
| 20      | 0.949   | 0.013               | 0.730   | 0.025               |
| 30      | 0.796   | 0.005               | 0.513   | 0.020               |
| 40      | 0.704   | 0.004               | 0.361   | 0.024               |
| 50      | 0.581   | 0.017               | 0.239   | 0.021               |
| 60      | 0.513   | 0.006               | 0.190   | 0.011               |
| 70      | 0.422   | 0.018               | 0.283   | 0.034               |
| 80      | 0.371   | 0.005               | 0.162   | 0.012               |
| 90      | 0.305   | 0.002               | 0.119   | 0.014               |
| 100     | 0.254   | 0.005               | 0.138   | 0.015               |

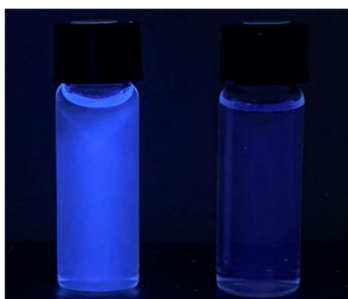

**Fig. S10** Picture of the reference sample (left; pure water) and the test sample (right; calibrated at 90% v/v ethanol solution) under UV light.

**Table S10** The measurement results of calibrated 90% v/v ethanol using the smartphone method.

| Test                          | 1     |       | 2     |       | 3     |       | 4     |       |
|-------------------------------|-------|-------|-------|-------|-------|-------|-------|-------|
|                               | Left  | Right | Left  | Right | Left  | Right | Left  | Right |
| Value of the blue channel     | 242   | 77    | 243   | 74    | 241   | 76    | 241   | 75    |
| Ratio                         | 0.318 |       | 0.305 |       | 0.315 |       | 0.311 |       |
| Concentration (% v/v)         | 88.35 |       | 90.05 |       | 88.70 |       | 89.22 |       |
| Average concentration (% v/v) | 89.08 |       |       |       |       |       |       |       |
| Standard deviation            | 0.640 |       |       |       |       |       |       |       |
| Absolute error (%)            | 0.92  |       |       |       |       |       |       |       |
| Relative error (%)            | 1.02  |       |       |       |       |       |       |       |

## 7. Computational analysis of the fluorescence mechanism

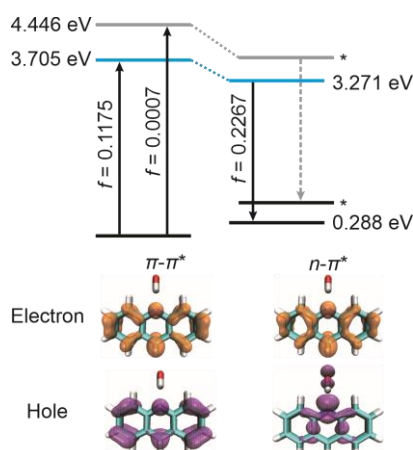

**Fig. S11** Energy levels of the dark  $n\text{-}\pi^*$  and bright  $\pi\text{-}\pi^*$  states of acridine attached with an explicit water molecule during the excitation and emission progresses in water using the  $\omega\text{B97XD}$  functional. The bottom row illustrates the hole-electron distributions during the vertical excitation (\* means the state was not optimized).

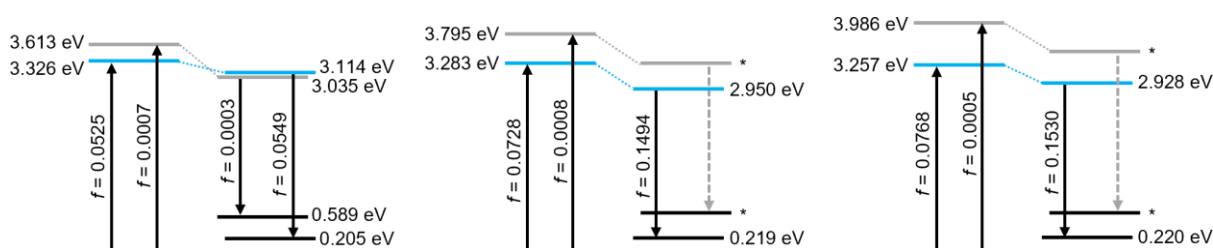

**Fig. S12** The presence of the dark  $n\text{-}\pi^*$  state and bright  $\pi\text{-}\pi^*$  state of acridine during the vertical excitation and emission progresses in vacuum (left), water (middle), and a water molecule attaching to the acridine in water (right) using the B3LYP functional (\* means the state was not optimized).

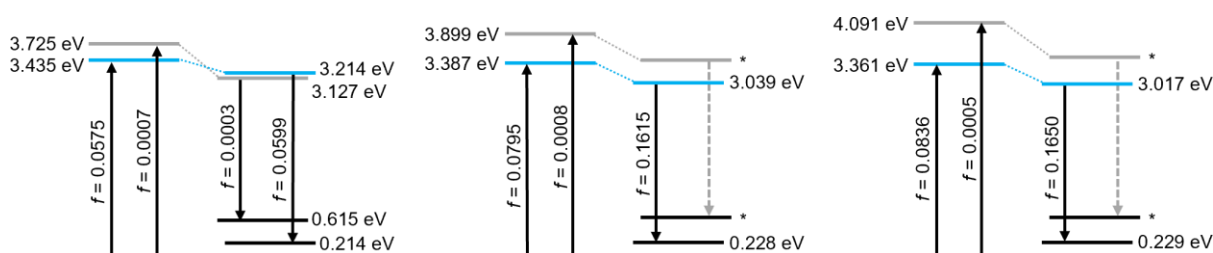

**Fig. S13** The presence of the dark  $n\text{-}\pi^*$  state and bright  $\pi\text{-}\pi^*$  state of acridine during the vertical excitation and emission progresses in vacuum (left), water (middle), and a water molecule attaching to the acridine in water (right) using the PBE0 functional (\* means the state was not optimized).

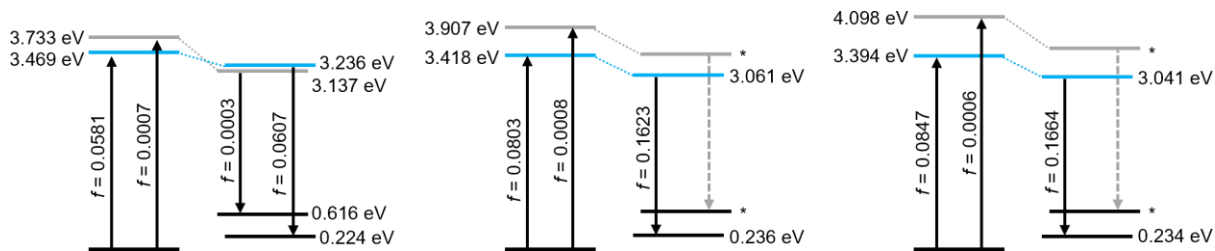

**Fig. S14** The presence of the dark  $n-\pi^*$  state and bright  $\pi-\pi^*$  state of acridine during the vertical excitation and emission progresses in vacuum (left), water (middle), and a water molecule attaching to the acridine in water (right) using the PW6B95 functional (\* means the state was not optimized).

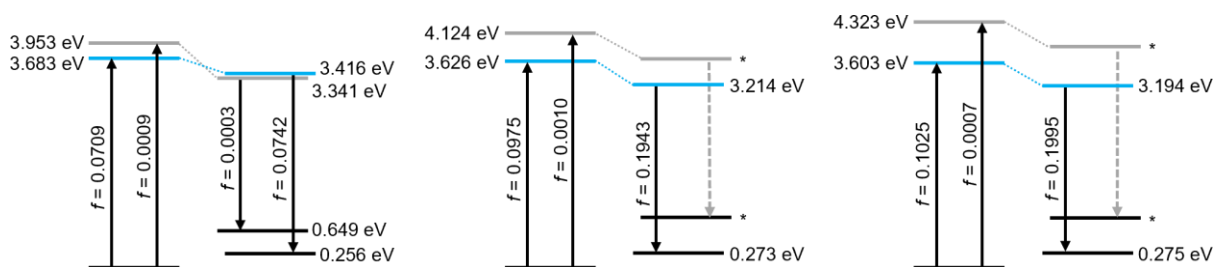

**Fig. S15** The presence of the dark  $n-\pi^*$  state and bright  $\pi-\pi^*$  state of acridine during the vertical excitation and emission progresses in vacuum (left), water (middle), and a water molecule attaching to the acridine in water (right) using the BMK functional (\* means the state was not optimized).

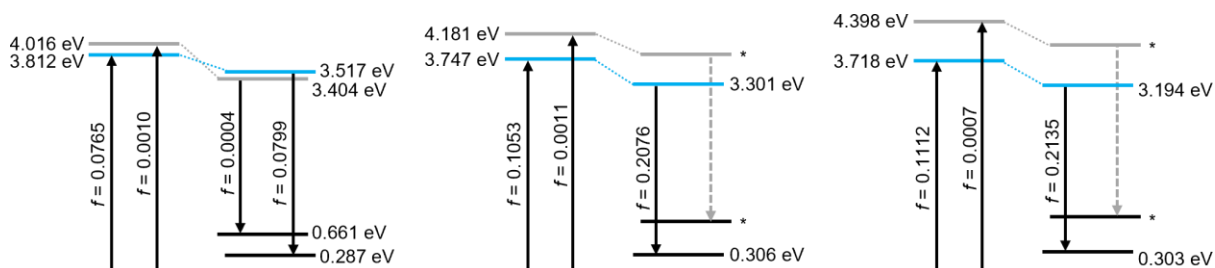

**Fig. S16** The presence of the dark  $n-\pi^*$  state and bright  $\pi-\pi^*$  state of acridine during the vertical excitation and emission progresses in vacuum (left), water (middle), and a water molecule attaching to the acridine in water (right) using the M06-2X functional (\* means the state was not optimized).

**Table S11** Solvatochromic parameters<sup>42, 43</sup> of different solvents and optical properties<sup>44</sup> of acridine in these solvents.

| Solvent    | $\pi^*$ | $\beta$ | $\alpha$ | Peak $\lambda_{em}$ (nm) | Quantum Yield ( $\times 10^3$ ) |
|------------|---------|---------|----------|--------------------------|---------------------------------|
| Hexane     | -0.08   | 0       | 0        | 405                      | 0.096                           |
| Benzene    | 0.59    | 0.1     | 0        | 410                      | 0.33                            |
| DMF        | 0.88    | 0.69    | 0        | 410                      | 0.028                           |
| ACN        | 0.75    | 0.31    | 0.19     | 410                      | 0.35                            |
| 2-Propanol | 0.48    | 0.95    | 0.76     | 413                      | 7.5                             |
| EtOH       | 0.54    | 0.77    | 0.83     | 415                      | 7.9                             |
| MeOH       | 0.6     | 0.62    | 0.93     | 417                      | 10.2                            |
| Formamide  | 0.97    | 0.48    | 0.71     | 420                      | 9.7                             |

**Table S12** Results of the multiple linear regression analysis for the quantum yields of acridine in different solvents with corresponding coefficients to three solvatochromic parameters.

| Regression Statistics |       | Coefficients |        |
|-----------------------|-------|--------------|--------|
| Multiple $R$          | 0.978 | Intercept    | -0.362 |
| $R^2$                 | 0.957 | $\pi^*$      | 1.376  |
| Adjusted $R^2$        | 0.924 | $\beta$      | -2.100 |
| Standard Error        | 1.292 | $\alpha$     | 11.907 |



## 8. References

- 1 K. Fischer, *Angew. Chem.*, 1935, **48**, 394-396.
- 2 S. A. Nogueira, A. D. Lemes, A. C. Chagas, M. L. Vieira, M. Talhavini, P. A. O. Morais and W. K. T. Coltro, *Talanta*, 2019, **194**, 363-369.
- 3 B. Danahy, D. Minnick and M. Shiflett, *Fermentation*, 2018, **4**, 72.
- 4 X. Li, J. Zhang, Y. Xue and L. Qiu, *Measurement*, 2022, **194**, 110955.
- 5 V. L.R.G. Abreu, J. L. M. Santos and J. L. F. C. Lima, *Food Anal. Methods*, 2011, **5**, 867-873.
- 6 N. Choengchan, T. Mantim, P. Wilairat, P. K. Dasgupta, S. Motomizu and D. Nacapricha, *Anal. Chim. Acta*, 2006, **579**, 33-37.
- 7 P. J. Fletcher and J. F. Van Staden, *Anal. Chim. Acta*, 2003, **499**, 123-128.
- 8 M. Sriariyanun, P. Mutrakulcharoen, S. Tapaamorndech, K. Cheenkachorn and K. Rattanaporn, *Orient. J. Chem.*, 2019, **35**, 744-750.
- 9 N. B. Tiscione, I. Alford, D. T. Yeatman and X. Shan, *J. Anal. Toxicol.*, 2011, **35**, 501-511.
- 10 G. Buckee and A. Mundy, *J. Inst. Brew.*, 1993, **99**, 381-384.
- 11 I. A. Wasfi, A. H. Al-Awadhi, Z. N. Al-Hatali, F. J. Al-Rayami and N. A. Al Katheeri, *J. Chromatogr. B: Anal. Technol. Biomed. Life Sci.*, 2004, **799**, 331-336.
- 12 E. F. López and E. F. Gómez, *J. Chromatogr. Sci.*, 1996, **34**, 254-257.
- 13 T. Yarita, R. Nakajima, S. Otsuka, T. Ihara, A. Takatsu and M. Shibukawa, *J. Chromatogr. A*, 2002, **976**, 387-391.
- 14 L. Bueno and T. R. Paixao, *Talanta*, 2011, **87**, 210-215.
- 15 C. Shan, H. Yang, D. Han, Q. Zhang, A. Ivaska and L. Niu, *Biosens. Bioelectron.*, 2010, **25**, 1504-1508.
- 16 S. Cinti, M. Basso, D. Moscone and F. Arduini, *Anal. Chim. Acta*, 2017, **960**, 123-130.
- 17 Y. Yu, S. Brandt, N. J. Nicolas and J. Aizenberg, *ACS Appl. Mater. Interfaces*, 2020, **12**, 1924-1929.
- 18 A. Shahvar, D. Shamsaei and M. Saraji, *Measurement*, 2020, **150**, 107068.
- 19 A. Sharma and N. S. M. Quantrill, *Spectrochim. Acta A: Mol. Spectrosc.*, 1994, **50**, 1161-1177.
- 20 X. Hu, H. Cao, W. Dong and J. Tang, *Talanta*, 2021, **233**, 122480.

- 21 W. E. Passos, I. P. Oliveira, F. S. Michels, M. A. G. Trindade, E. A. Falcão, B. S. Marangoni, S. L. Oliveira and A. R. L. Caires, *Renew. Energy*, 2021, **165**, 42-51.
- 22 Y.-u. Jung, M. G. Choi, S. H. Lee and S.-K. Chang, *Sens. Actuators B: Chem.*, 2017, **241**, 342-348.
- 23 H. Q. Yin, J. C. Yang and X. B. Yin, *Anal. Chem.*, 2017, **89**, 13434-13440.
- 24 R. Huang, K. Liu, H. Liu, G. Wang, T. Liu, R. Miao, H. Peng and Y. Fang, *Anal. Chem.*, 2018, **90**, 14088-14093.
- 25 A. D. Becke, *J. Chem. Phys.*, 1993, **98**, 5648-5652.
- 26 G. Scalmani, M. J. Frisch, B. Mennucci, J. Tomasi, R. Cammi and V. Barone, *J. Chem. Phys.*, 2006, **124**, 94107.
- 27 M. J. Frisch, G. W. Trucks, H. B. Schlegel, G. E. Scuseria, M. A. Robb, J. R. Cheeseman, G. Scalmani, V. Barone, G. A. Petersson, H. Nakatsuji, X. Li, M. Caricato, A. V. Marenich, J. Bloino, B. G. Janesko, R. Gomperts, B. Mennucci, H. P. Hratchian, J. V. Ortiz, A. F. Izmaylov, J. L. Sonnenberg, D. Williams-Young, F. Ding, F. Lipparini, F. Egidi, J. Goings, B. Peng, A. Petrone, T. Henderson, D. Ranasinghe, V. G. Zakrzewski, J. Gao, N. Rega, G. Zheng, W. Liang, M. Hada, M. Ehara, K. Toyota, R. Fukuda, J. Hasegawa, M. Ishida, T. Nakajima, Y. Honda, O. Kitao, H. Nakai, T. Vreven, K. Throssell, J. A. Montgomery, Jr., J. E. Peralta, F. Ogliaro, M. J. Bearpark, J. J. Heyd, E. N. Brothers, K. N. Kudin, V. N. Staroverov, T. A. Keith, R. Kobayashi, J. Normand, K. Raghavachari, A. P. Rendell, J. C. Burant, S. S. Iyengar, J. Tomasi, M. Cossi, J. M. Millam, M. Klene, C. Adamo, R. Cammi, J. W. Ochterski, R. L. Martin, K. Morokuma, O. Farkas, J. B. Foresman, and D. J. Fox, Gaussian, Inc., Wallingford CT, 2016.
- 28 C. C. J. Roothaan, *Rev. Mod. Phys.*, 1951, **23**, 69-89.
- 29 A. J. Cohen and N. C. Handy, *Mol. Phys.*, 2001, **99**, 607-615.
- 30 C. Adamo and V. Barone, *J. Chem. Phys.*, 1999, **110**, 6158-6170.
- 31 A. V. Krukau, O. A. Vydrov, A. F. Izmaylov and G. E. Scuseria, *J. Chem. Phys.*, 2006, **125**, 224106.
- 32 Y. Zhao and D. G. Truhlar, *J. Phys. Chem. A*, 2005, **109**, 5656-5667.
- 33 A. D. Boese and J. M. Martin, *J. Chem. Phys.*, 2004, **121**, 3405-3416.
- 34 Y. Zhao and D. G. Truhlar, *Theor. Chem. Acc.*, 2007, **120**, 215-241.
- 35 J. D. Chai and M. Head-Gordon, *Phys. Chem. Chem. Phys.*, 2008, **10**, 6615-6620.
- 36 F. Weigend and R. Ahlrichs, *Phys. Chem. Chem. Phys.*, 2005, **7**, 3297-3305.

- 37 A. V. Marenich, C. J. Cramer and D. G. Truhlar, *J. Phys. Chem. B*, 2009, **113**, 6378-6396.
- 38 K. V. Mikkelsen, P. Jo/rgensen and H. J. r. A. Jensen, *J. Chem. Phys.*, 1994, **100**, 6597-6607.
- 39 M. Caricato, B. Mennucci, J. Tomasi, F. Ingrosso, R. Cammi, S. Corni and G. Scalmani, *J. Chem. Phys.*, 2006, **124**, 124520.
- 40 T. Lu and F. Chen, *J. Comput. Chem.*, 2012, **33**, 580-592.
- 41 W. Humphrey, A. Dalke and K. Schulten, *J. Mol, Graph.*, 1996, **14**, 33-38.
- 42 M. J. Kamlet, J. L. M. Abboud, M. H. Abraham and R. Taft, *J. Org. Chem.*, 1983, **48**, 2877-2887.
- 43 Y. Marcus, *Chem. Soc. Rev.*, 1993, **22**, 409-416.
- 44 L. A. Diverdi and M. R. Topp, *J. Phys. Chem.*, 1984, **88**, 3447-3451.
